# Supplementary material for: Gelatin-Based Hydrogels through Homobifunctional Triazolinediones Targeting Tyrosine Residues
Source: PubMed Central journal article supplement (PMC6385110; doi:10.3390/molecules24030589), 2019-02-07
Supplement: molecules-24-00589-s001.pdf [file molecules-24-00589-s001.pdf]

## Supplementary Material

# Gelatin-based hydrogels through homobifunctional triazolinediones targeting tyrosine residues

Roberto Guizzardi,<sup>1,§</sup> Luca Vaghi,<sup>2,§</sup> Marcello Marelli,<sup>3</sup> Antonino Natalello,<sup>1</sup> Ivan Andreosso,<sup>2</sup> Antonio Papagni,<sup>2,\*</sup> Laura Cipolla<sup>1,\*</sup>

<sup>1</sup> Dept. of Biotechnology and Biosciences, University of Milano - Bicocca, Piazza della Scienza 2, 20126 Milano-IT; laura.cipolla@unimib.it

<sup>2</sup> Dept. of Materials Science, University of Milano - Bicocca,, via R. Cozzi 55, 20125 Milano-IT; luca.vaghi@unimib.it.

<sup>3</sup> CNR, Institute of Molecular Science and Technologies, Via C. Golgi 19, 20133 Milano-IT; m.marelli@istm.cnr.it.

§ These authors contributed equally to this work

\* Correspondence laura.cipolla@unimib.it; Tel.: +39-0264483460

## Table of Contents

**Scheme S1.** Synthesis of the cross-linking agents and experimental procedures.

**Figure S1.** <sup>1</sup>H NMR of urazole **3**.

**Figure S2.** <sup>1</sup>H NMR of urazole **4**.

**Figure S3.** ATR-FTIR of urazole **3**.

**Figure S4.** ATR-FTIR of urazole **4**.

**Figure S5.** SEM images of hydrogels.

**References**

## Synthesis of cross-linking agents

### Synthesis of TAD 1

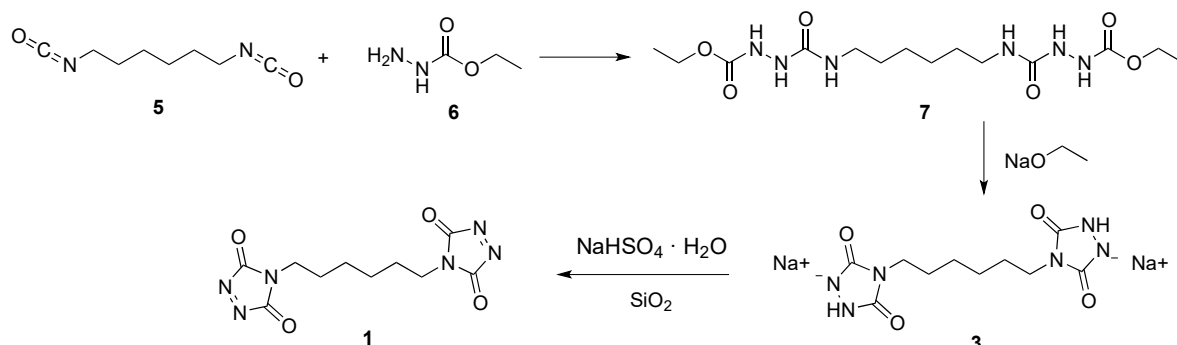

### Synthesis of TAD 2

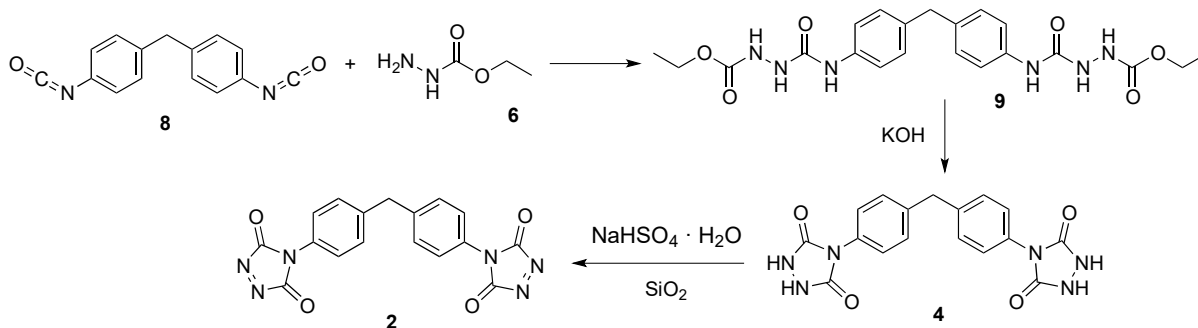

**Scheme S1.** Synthetic scheme for the synthesis of TAD 1 and 2.

The methodologies for the synthesis of TAD 1 and 2 were adapted from the procedures reported by Culbertson and McGrath [1]. The procedure by Mallakpour and co-worker was used for the oxidation of urazoles 3 and 4 [2].

*Diethyl 4,13-dioxo-2,3,5,12,14,15-hexaazahexadecane-1,16-dioate (7).* Ethylcarbazate **6** (2.08 g, 20 mmol) was dissolved in 100 mL of dry toluene, under nitrogen atmosphere. The solution was cooled to 0°C, then 1,6-diisocyanate hexane **5** (1.68g, 10 mmol), in 10 ml of dry toluene, was added over a period of 10 min. The mixture was rinsed to r.t. and stirred for 30 min, then refluxed for 3 h. After cooling to r.t., the product was recovered by filtration, washed with cold toluene, and dried at 80°C overnight (3.5 g, 94%). The physical and spectroscopic data corresponded to those reported in the literature [1].

*Diethyl 2,2'-[methylenebis(4,1-phenyleneiminocarbonyl)]dihydrazinecarboxylate (9).* Ethylcarbazate **6** (2.08 g, 20 mmol) was dissolved in 100 mL of dry toluene, under nitrogen atmosphere. The solution was cooled to 0°C, then 1,1'-methylenebis(4-isocyanatobenzene) **8** (2.5g, 10 mmol), in 10 ml of dry toluene, was added over a period of 10 min. The mixture was rinsed to r.t. and stirred for 30 min, then refluxed for 3 h. After cooling to r.t., the product was recovered by filtration, washed with cold toluene, and dried at 80°C overnight (4.4 g, 96%). The physical and spectroscopic data corresponded to those reported in the literature [1].

*1,6-Hexanebisurazole di-sodium salt (3).* **7** (1.89 g, 5 mmol) and NaOEt (0.85 g, 12.5 mmol) were added to EtOH (20 mL), under nitrogen atmosphere. The reaction mixture was then heated for 24h. After 1h a clear orange solution was formed and after few hours a yellowish solid start to precipitate. The residue was collected by filtration and dried overnight at 80°C under vacuum (10 torr) affording **3** (1.6 g, 98%). The physical and spectroscopic data corresponded to those reported in the literature [1].

*4,4'*-[methylenebis(4,1-phenylene)]bis(1,2,4-triazolidine-3,5-dione) (**4**). **9** (4 g, 8.7 mmol) in KOH aq (25 mL, 4 M) was heated at 100 °C for 5 h. The mixture was then cooled with an ice bath and acidified with concentrated HCl (37%) until pH ≈ 1. The residue was collected by filtration and dried overnight at 80°C under vacuum (10 torr) (2.75 g, 86%). The physical and spectroscopic data corresponded to those reported in the literature [1].

*4,4'*-hexane-1,6-diylbis(3H-1,2,4-triazole-3,5(4H)-dione) (**1**) and *4,4'*-[methylenebis(4,1-phenylene)]bis(3H-1,2,4-triazole-3,5(4H)-dione) (**2**). Urazole (1 mmol) was grinded into a mortar with NaHSO<sub>4</sub> · H<sub>2</sub>O (8 equiv) and SiO<sub>2</sub> (400 mg, 70 - 200 μm). Water (200 μl) was added to the fine powder obtained, and the resulting mixture was stirred for 5 min. CH<sub>2</sub>Cl<sub>2</sub> (25 mL) was then added and the suspension was cooled to 0 °C and kept in the dark for the whole reaction time. Every 30 min NaNO<sub>2</sub> (2 equiv) was added to the reaction mixture (8 eq. overall). The inorganic salts were removed by filtration and the solvent was removed under reduced pressure affording **1** and **2** in a pure form (210 mg, 75% for **1**; 217 mg, 60% for **2**). The physical and spectroscopic data corresponded to those reported in the literature [2].

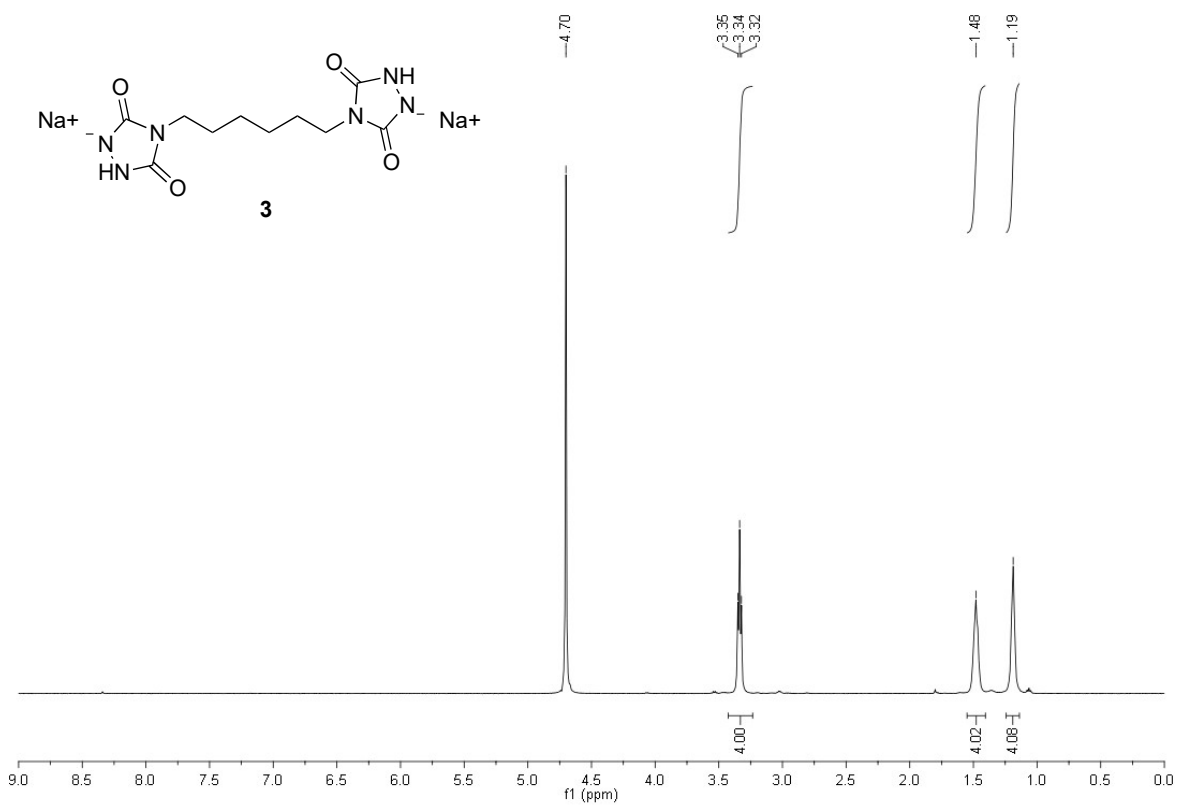

Figure S1. <sup>1</sup>H NMR of urazole 3.

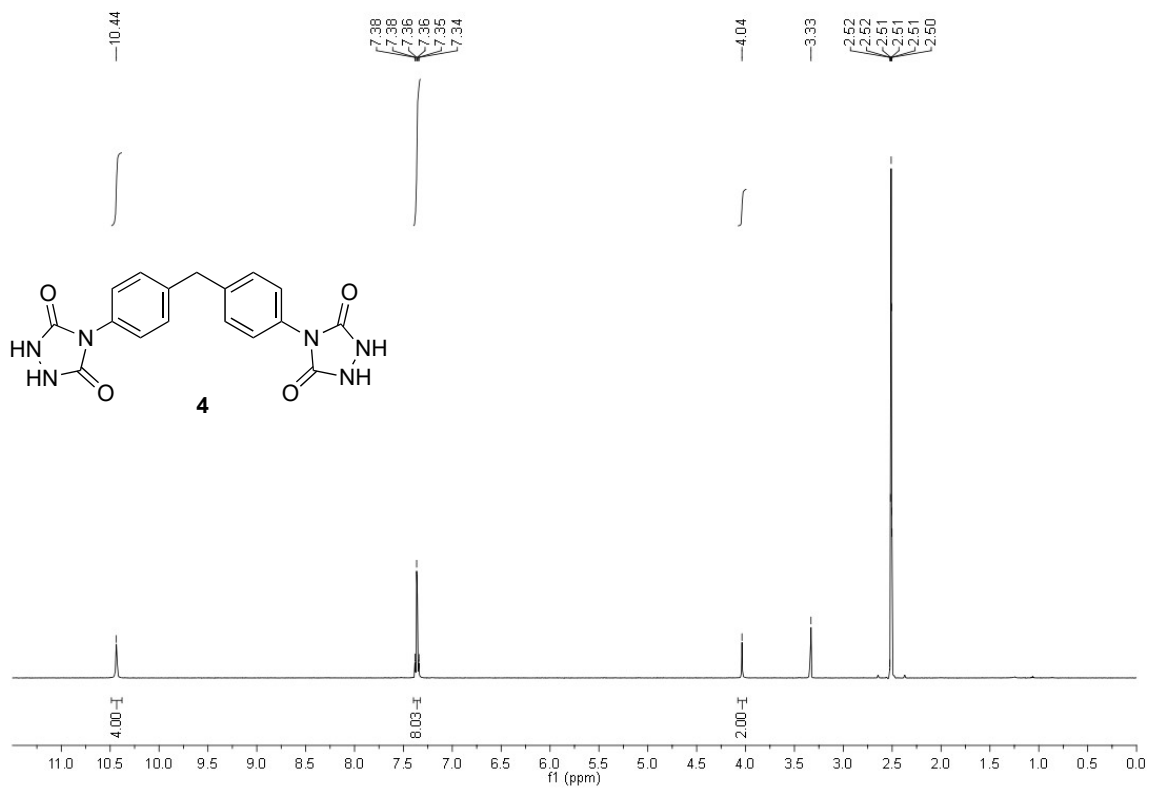

Figure S2. <sup>1</sup>H NMR of urazole 4.

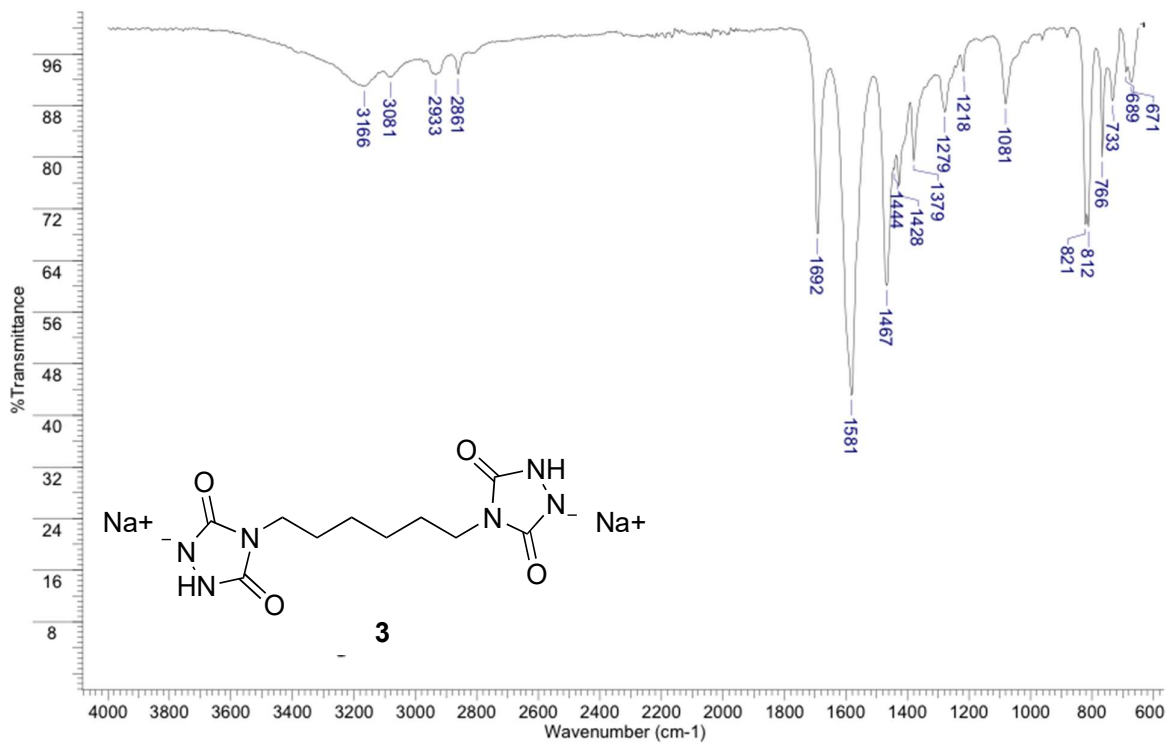

Figure S3. ATR-FTIR of urazole 3.

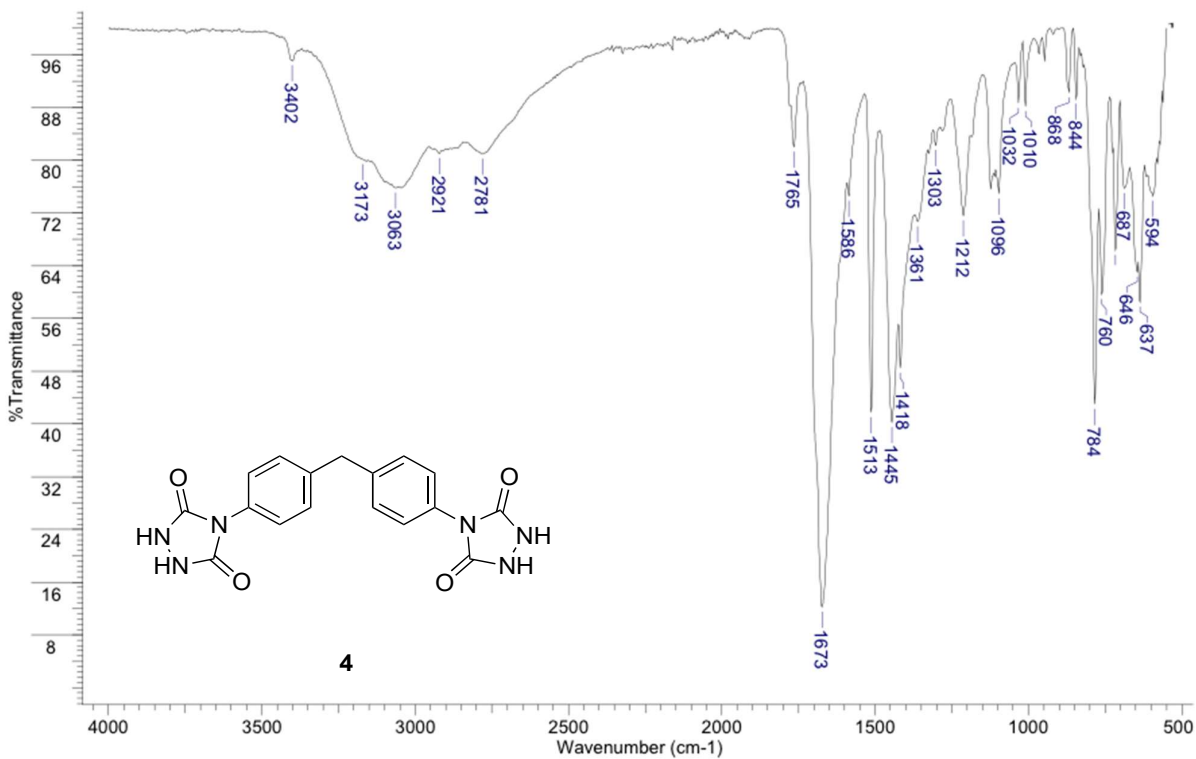

Figure S4. ATR-FTIR of urazole 4.

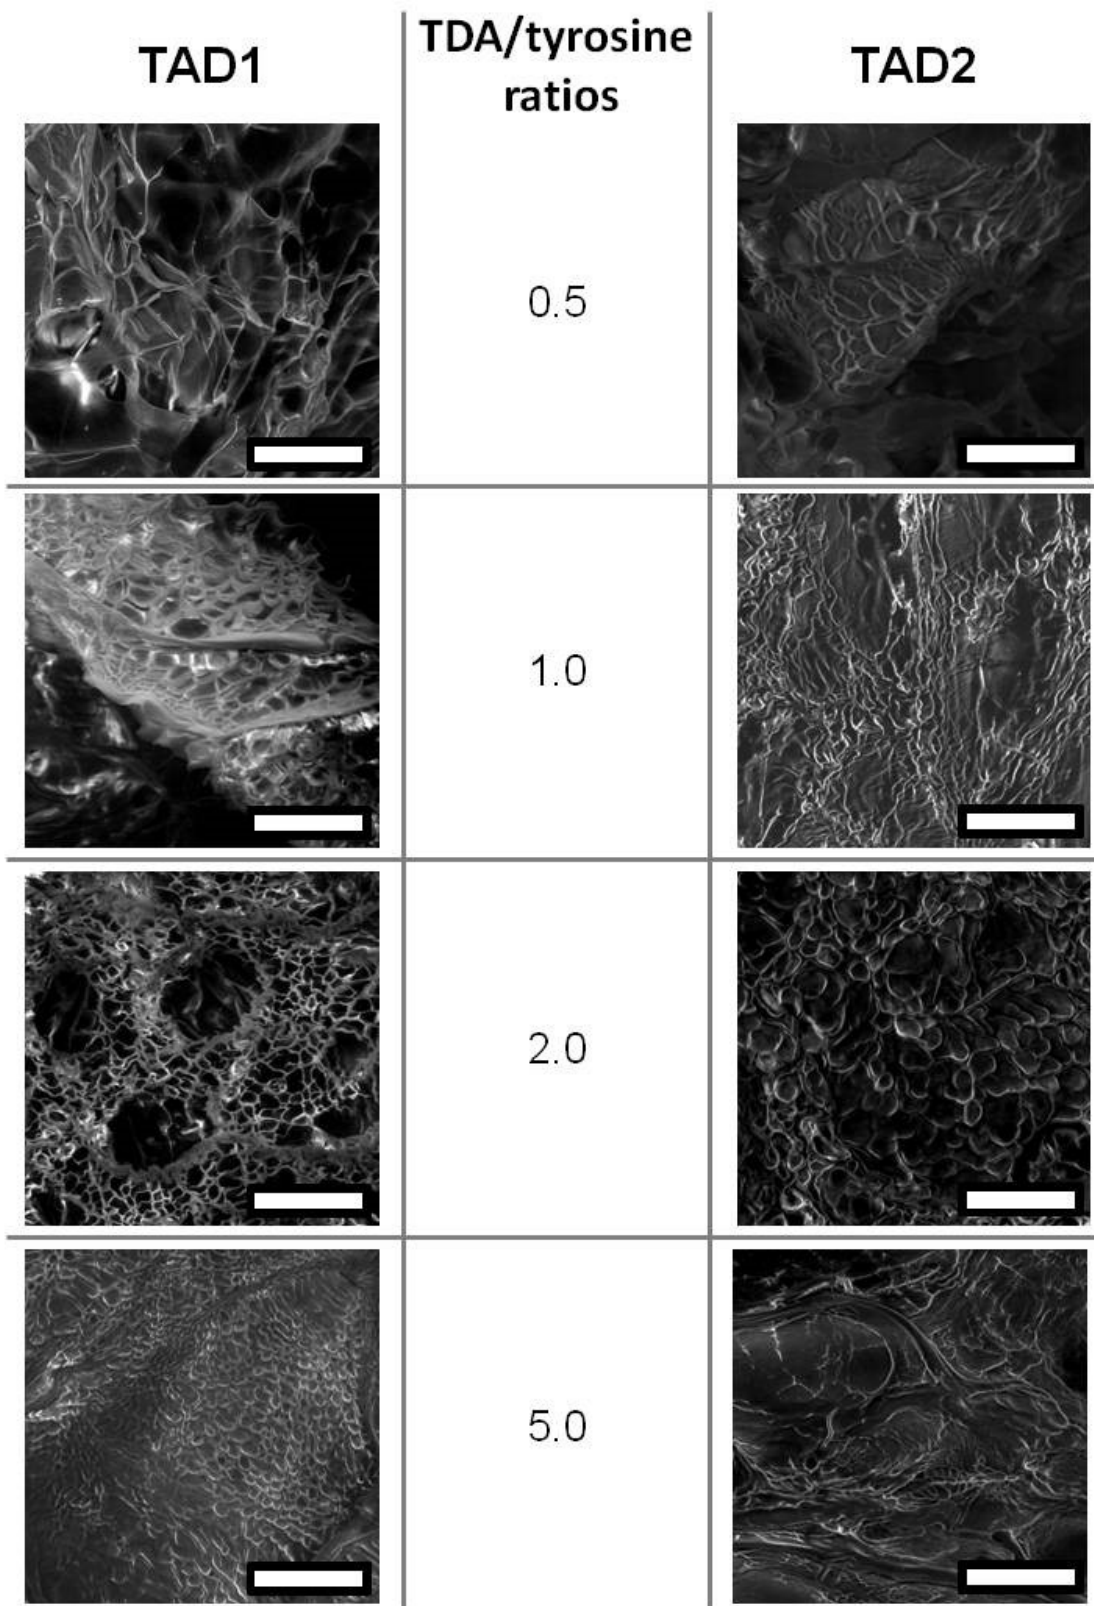

**Figure S5.** Representative SEM images for sample Gel\_TAD1 e Gel\_TAD2 at different TAD/tyrosine ratios. All the images were collected at the same magnification and scale bar is 50 nm.

## References

- [1] Culbertson, B.M.; McGrath, J. E.; Polymer science and technology; Plenum Press New York; 1985; Volume 31, pp. 8-11, ISBN:13:978-1-4612-9254-8.
- [2] Zolfigol, M. A.; Mallakpour, S. E.; Madrakian, E.; Ghaemi, E.; Oxidation of urazoles to their corresponding triazolinediones under mild and heterogeneous conditions. *Indian J. Chem., Sect. B: Org. Chem. Incl. Med. Chem.* **2000**, 39, 308-310, 2000:780195.
